# Supplementary material for: Proton Pump Inhibition Enhances the Cytotoxicity of Paclitaxel in Cervical Cancer
Source: PubMed Central journal article supplement — Cancer Res Treat. 2016 Sep 27;49(3):595–606. doi: 10.4143/crt.2016.034 (PMC5512380; doi:10.4143/crt.2016.034), 2016-09-27
Supplement: crt-2016-034-supple3.pdf [file crt-2016-034-supple3.pdf]

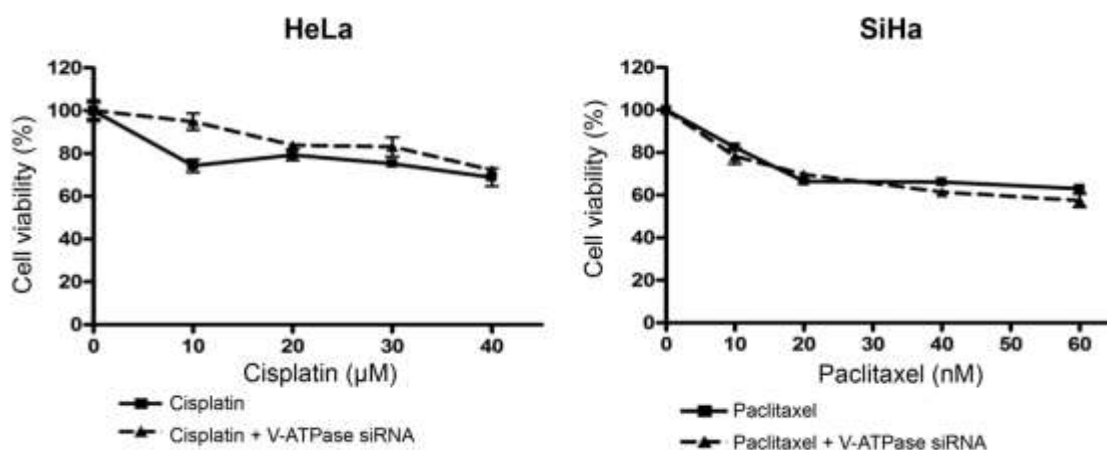

**S3 Fig.** (A) Effects of vacuolar-type  $\text{H}^+$  ATPase (V-ATPase) siRNA transfection on cell viability with cisplatin in HeLa cells. (B) Effects of V-ATPase siRNA transfection on cell viability with paclitaxel in SiHa cells.
