# Supplementary material for: Proton Pump Inhibition Enhances the Cytotoxicity of Paclitaxel in Cervical Cancer
Source: PubMed Central journal article supplement — Cancer Res Treat. 2016 Sep 27;49(3):595–606. doi: 10.4143/crt.2016.034 (PMC5512380; doi:10.4143/crt.2016.034), 2016-09-27
Supplement: crt-2016-034-supple4.pdf [file crt-2016-034-supple4.pdf]

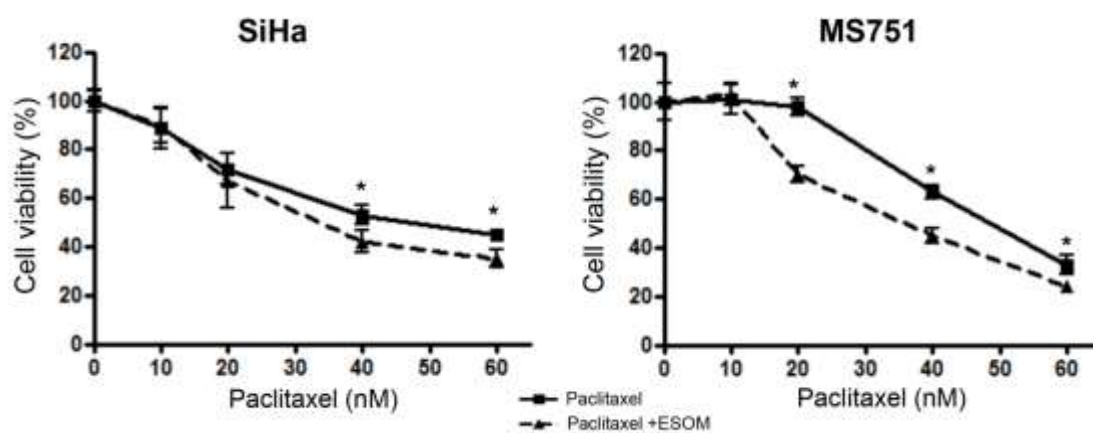

**S4 Fig.** Effects of esomeprazole (ESOM) pretreatment on cell viability and apoptosis with paclitaxel in SiHa and MS751 cells. ESOM pretreatment significantly enhanced the cytotoxicity of paclitaxel in SiHa (11%,  $p < 0.01$ ) and MS751 cells (18%,  $p < 0.01$ ) when compared with paclitaxel pretreatment. \* $p < 0.05$ .
